# Supplementary material
Source: publisher site journal article supplement (https://www.degruyter.com/publication/journal_key/CASLAR/downloadAsset/CASLAR_CASLAR_Instructions-for-Authors.pdf)
Supplement: Supplementary file 1 [file CASLAR_CASLAR_Instructions-for-Authors.pdf]

# Chinese as a Second Language Research

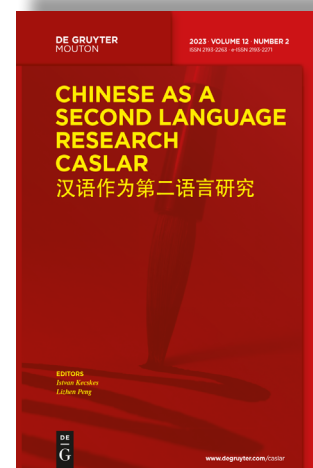

## Table of Content

|                                                                  |          |
|------------------------------------------------------------------|----------|
| <b>Scope and general policies of the journal</b> .....           | <b>2</b> |
| Scope .....                                                      | 2        |
| Article (manuscript) categories .....                            | 2        |
| Submissions in the following fields are welcome .....            | 2        |
| <b>Peer review, turnaround times and preprint policies</b> ..... | <b>2</b> |
| Peer review information.....                                     | 2        |
| Turnaround time .....                                            | 2        |
| Rejection of manuscripts.....                                    | 3        |
| Appeals.....                                                     | 3        |
| Preprint policy.....                                             | 3        |
| Inclusive language policy.....                                   | 3        |
| <b>Submission of manuscripts</b> .....                           | <b>3</b> |
| ORCID .....                                                      | 3        |
| Submission declaration and verification .....                    | 3        |
| Scientific misconduct .....                                      | 4        |
| Research integrity .....                                         | 4        |
| <b>Post-acceptance</b> .....                                     | <b>4</b> |
| Galley proofs.....                                               | 4        |
| Offprints.....                                                   | 4        |
| Repository policy .....                                          | 4        |
| Subscription-based and hybrid journals.....                      | 4        |
| Copyright .....                                                  | 5        |
| Open Access in hybrid journals.....                              | 5        |
| Article Processing Charges (APCs).....                           | 5        |
| <b>Ethical conduct of research</b> .....                         | <b>5</b> |
| Acknowledgments .....                                            | 5        |
| Research funding.....                                            | 5        |
| Data availability .....                                          | 6        |
| <b>Preparation of manuscript</b> .....                           | <b>7</b> |
| Title page information.....                                      | 7        |
| Language .....                                                   | 7        |
| General format and manuscript elements.....                      | 7        |
| Manuscript formatting .....                                      | 7        |
| Abstract.....                                                    | 8        |
| Keywords.....                                                    | 8        |
| Headings .....                                                   | 8        |
| References.....                                                  | 8        |
| Figures and figure captions .....                                | 8        |
| Tables and table captions .....                                  | 8        |
| Abbreviations.....                                               | 9        |
| Equations and symbols.....                                       | 9        |
| Linguistic examples.....                                         | 9        |
| Units .....                                                      | 10       |
| Audio and Video .....                                            | 10       |
| Appendices.....                                                  | 10       |
| Supplementary material .....                                     | 10       |
| Author biography .....                                           | 10       |

## Scope and general policies of the journal

### Scope

- *Chinese as a Second Language Research (CASLAR)* focuses on research on the acquisition, development, and use of Chinese as a Second Language. It supports scholars and researchers from different linguistic fields, and serves as a forum to discuss, investigate, and better understand Chinese as a Second Language. Each issue of the journal publishes three papers in Chinese and three papers in English; summaries are always provided both in Chinese and English.  
The CASLAR journal is also a forum of the CASLAR Association that was established at the 3rd CASLAR conference at the University of Parma, Italy in 2014. Website of the CASLAR Association is [www.caslar-center.com](http://www.caslar-center.com)
- list of subjects covered by the journal:
  - Issues in Chinese linguistics as related to language acquisition
  - Research in Chinese as a second/foreign language
  - Chinese language acquisition
  - Chinese language teaching methodology
- targeted audience: Researchers, teachers and students in Applied Linguistics, Chinese Linguistics, Second Language Acquisition, Intercultural Pragmatics, and Chinese language teaching
- Two issues per year, print and online, English and Chinese

### Article (manuscript) categories

- Research Article
- Theoretical Paper addressing an issue from a novel perspective
- Statement Paper for Forum section
- Book Review

### Submissions in the following fields are welcome

We are especially interested in publishing articles and research papers that

- investigate how empirical findings of CSL research can advance and develop better Chinese language teaching methodologies,
- explore the implications of CSL research for theoretical developments and practical applications
- focus on the acquisition and use of varieties of CSL
- study the nature of interaction between native speakers and non-native speakers of Chinese
- address major issues of second language acquisition from the perspective of CSL
- analyze the ways in which language is both shaped by culture and is the medium through which culture is created

## Peer review, turnaround times and preprint policies

### Peer review information

*CASLAR* is a single-blind journal. Manuscripts are reviewed anonymously by at least two independent reviewers selected by the Editors. You will be informed by e-mail if your manuscript has been accepted or rejected or if it requires further attention. Reviewers' comments will be available to the authors. Every effort is made to respond to the authors in a timely manner.

The editors reserve the right to reject submitted manuscripts without peer review if the studies are not novel or important enough to merit publication in the journal. Manuscripts deemed unsuitable (insufficient originality or limited interest to the target audience) will be also rejected without review.

### Turnaround time

*CASLAR* aspires to inform authors of the peer review decision within 8–12 weeks from submission date. Revised manuscripts should be returned within 3–6 weeks. Accepted articles will be published online within 8 weeks after issue-wise manuscript transfer to production.

### Rejection of manuscripts

Manuscripts that do not meet the quality requirements of the journal (novelty, structure, language, well-defined methodology) or manuscripts that do not fit into the scope of the journal, are likely to be rejected without peer review.

Manuscripts are also returned to authors if they do not comply with the Instructions for Authors.

### Appeals

Manuscripts that have been rejected for publication will be reconsidered only at the discretion of the Editor(s). Authors wishing to request reconsideration of a previously rejected manuscript must do so in written form and submit a rebuttal by e-mail to the journal's editorial office. Authors should provide detailed reasons why they believe the manuscript should be reconsidered. If the rebuttal is accepted, the author will be asked to re-submit the manuscript, or the decision will be reversed.

### Preprint policy

De Gruyter does not consider the following purposes of a paper as pre-publication: publication in the form of a congress abstract, publication as an academic thesis, publication as an electronic preprint on recognized servers such as arXiv, RePEc, bioRxiv, ResearchSquare, etc.

### Inclusive language policy

Inclusive language recognizes diversity, conveys respect for all people, is sensitive to differences and promotes equal opportunities. Content should not make assumptions about readers' beliefs or commitments; should not contain anything that might suggest that one person is superior to another because of age, gender, race, ethnicity, culture, sexual orientation, disability or health condition; and should use inclusive language throughout. Authors should ensure that their writing is free from prejudice, stereotypes, slang, references to the dominant culture and/or cultural assumptions.

## Submission of manuscripts

Please send inquiries and submissions:

- in English to Prof. Dr. Istvan Kecskes ([icup@albany.edu](mailto:icup@albany.edu))
- in Chinese to Prof. Dr. Lizhen Peng ([plizhen@zju.edu.cn](mailto:plizhen@zju.edu.cn))

We strongly recommend the authors register with institutional e-mail addresses, and refrain from using private e-mail addresses. A cover letter must be submitted for each manuscript upon first submission. It should contain a brief statement by the authors as to the element of novelty upon which they base their request for publication in *CASLAR*. Please address the cover letter to the Editor-in-Chief. Revised manuscripts must be accompanied by a point-by-point reply to the reviewers' criticisms. Major changes in the revised manuscript must be highlighted, preferably in tracked changes mode. A second, clean version should always be submitted for major changes.

### ORCID

The ORCID (Open Researcher and Contributor ID) is a non-profit, publisher-independent system that is used to uniquely identify academics and their publications. Click [here](#) for detailed information about ORCID. Submitting authors can login with username and password. If the journal uses ScholarOne as submission tool, authors can also login with their ORCID number. Providing an ORCID number for each author is strongly recommended. ORCID numbers should be listed on the title page.

### Submission declaration and verification

For information on plagiarism, please refer to [COPE – Committee of Publication Ethics](#). Submission of a manuscript to a journal implies that the work described has not been published previously, except in the form of an abstract, academic thesis, lecture, or preprint; that it is not under consideration for publication elsewhere (multiple, redundant, concurrent publication); that publication of the work is approved by all authors and tacitly or explicitly by the responsible authorities where the work was carried out; and that, if accepted for publication, it will not be published elsewhere, no matter in which language, without the written consent of the Publisher. Exceptions are listed under Preprint policy.

To exclude potential overlap with prior publication(s), your manuscript may be checked by the plagiarism checker Crossref Similarity Check ([iThenticate](#)). Previously published material must be referenced appropriately in the manuscript, regardless of whether the material was previously published in a subscription based, hybrid or open access journal, or in another language.

### Scientific misconduct

Only articles that have not been or will not be published elsewhere will be published in the journal, excluding articles that fall under De Gruyter's [Repository Policy](#). Multiple submissions/publications or redundant publications (i.e., republication of data already published by the same authors) will be rejected. If identified after publication, the journal reserves the right to publish a retraction note. In any case, editors will follow COPE's Code of Conduct and implement its advice.

### Research integrity

The authors are responsible for all aspects of the study and will ensure that any questions regarding the accuracy and integrity of any part of the work are adequately investigated and resolved.

With submitting your manuscript to CASLAR the authors declare that they are the sole and intellectual authors of the manuscript. We do not accept submissions that name Artificial Intelligence (AI) and/or Machine Learning Tools as credited author(s) on a manuscript because such tools cannot take responsibility for the submitted work and therefore cannot be considered as eligible authors. Where such tools or technologies are used as part of the design or methodology of a research study, their use should be clearly described in the Acknowledgments section.

## Post-acceptance

### Galley proofs

**PDF proofreading:** The corresponding author of an article receives the galley proofs in electronic form to check them for editorial and typesetting accuracy. Corresponding authors receive an e-mail notification ("Check your proof") with a link to the author's page. Here they can download the PDF proof. As soon as the corrections and answers to comments are marked in the PDF file, the author uploads the proof file to the same page and submits it to production.

All instructions for proof corrections, including deadlines, will be given in the e-mail notification to the corresponding author, along with a user guide, providing step-by-step instructions for inserting corrections.

Substantial changes to an article accepted for publication will only be considered with the permission of the Editor or after additional peer review. The responsibility for proofreading lies solely with the authors. **According to De Gruyter policy, once an article has been accepted, no changes to the author list and article title are allowed (except typos). The De Gruyter production team is instructed to enforce this policy during the production/proof correction process.**

### Offprints

Electronic files of typeset articles in Adobe Acrobat PDF format are provided free of charge. The corresponding author will receive an e-mail notification when the article has been published online along with instructions on how to access the article.

### Repository policy

Policies for sharing published journal articles differ for subscription-based and open access articles.

#### Subscription-based and hybrid journals

Authors may publish their articles in a public repository after an embargo period of 12 months (see De Gruyter's [Sharing Policy](#)). Only the accepted author version of the manuscript, not the PDF version of the published article, can be published:

Immediately

- via their non-commercial personal website, blog or social media channels
- by updating a preprint in arXiv, RePEc, bioRxiv, ResearchSquare, etc. with the version of the accepted manuscript

- as a closed deposit via their research institute or institutional repository for internal institutional purposes or as part of an invitation-only research collaboration workgroup
- directly by providing copies to their students or to research collaborators for their personal use
- for private scholarly sharing as part of an invitation-only work group

After an embargo period

- as open deposits to institutional or subject repositories
- to scholarly collaboration networks (SCNs)

### Copyright

Manuscripts submitted to subscription and hybrid journals are accepted on condition of transfer of copyright ([License to Publish](#)) (for U.S. government employees: to the extent transferable) to the publisher. Once the manuscript has been accepted, it may not be published elsewhere without the consent of the copyright holders.

### Open Access in hybrid journals

The author declares consent to place the article under the Creative Commons license CC-BY 4.0. In this case, the exclusive rights previously granted to the publisher will be converted into non-exclusive rights. The author confirms that they have already acquired all necessary rights for all components of the work in the event of an open access publication. For more information, refer to paragraph 5 in the [License to Publish](#).

### Article Processing Charges (APCs)

Authors publishing in **hybrid journals** do not have to pay APCs if they do not wish to publish their article open access. After acceptance and before production of an article, authors can decide whether to publish their article open access. Only if they decide to publish open access, APCs will be charged. All articles are peer-reviewed and accepted for publication based on the quality of their scientific contribution. The decision to publish open access does not affect the peer review process or the acceptance of the article. De Gruyter has [institutional agreements](#) in place that allow authors to publish open access articles at no cost at all – or with a significant discount. For more information on De Gruyter's open access policy, please read our [Open Access Policies](#).

### Ethical conduct of research

**Manuscripts must follow certain ethical guidelines** to be considered for publication. These can generally be found in the [Publication Ethics and Malpractice Statement](#). Accordingly, **before submitting your manuscript, please make sure that you and your co-authors agree to the applicable requirements**. For example, this may involve declaring and ruling out conflicts of interest or proving compliance with legal requirements related to human and animal testing.

Furthermore, our [Code of Conduct for Publication Procedures and Ethics](#) defines the responsibility of De Gruyter as a publisher and the Editors we work with, to ensure the legitimacy and quality of our published research. Our principles are based on the guidelines of the [Committee on Publication Ethics \(COPE\)](#).

### Acknowledgments

Authors may wish to acknowledge individuals, working groups, institutions, etc. who provided help and support (other than financial) during research and the preparation of the manuscript (e.g., language checking, writing assistance or proof reading of the article, etc.). Individuals acknowledged are not included on the title page, as a footnote to the title or otherwise.

We do not accept submissions that name Artificial Intelligence (AI) and/or Machine Learning Tools as credited author(s) on a manuscript because such tools cannot take responsibility for the submitted work and therefore cannot be considered as eligible authors. Where such tools or technologies are used as part of the design or methodology of a research study, their use should be clearly described in the Acknowledgments section.

### Research funding

Funding sources should be listed at the end of the manuscript, before the References. When the study benefitted from funding through an unrestricted grant or other resources provided to a university, college, other research institution, or an individual author, state the name of the institute or organization that provided the funding along with the grant number, if applicable.

**Data availability**

CASLAR requires authors to follow our [Data Sharing Policy](#), which must comply with the European GDPR (*General Data Protection Regulation*) rules. Research data should be made widely available to the research community to demonstrate the robustness and validity of the research presented in the journal, to enable and encourage replication of the results, and to allow the community with opportunities to learn.

## Preparation of manuscript

### Title page information

Please provide the following information on the first page of your manuscript during the submission process:

- Author names

Write at least one given and family name in full. For all other names, initial is sufficient. List authors in the order you want them to appear in the final version. Indicate the corresponding author by using an asterisk “\*” after the family name. Please note that as per De Gruyter policy, no author list changes are permitted after acceptance of a manuscript.

Author footnotes (superscript letters or numbers) to explain authorship details are not all allowed in the author line and will be converted to an author note on the first page. Kindly stick to the wording as in the examples below:

- [Full name author A] and [full name author B] contributed equally to this work.
- [Full name author A] and [full name author B] contributed equally to this work and share first authorship.
- [Full name author A] and [full name author B] share senior authorship.
- [Full name author A] and [full name author B] share first authorship.

- Title and short title

Provide a descriptive, concise and comprehensible main title as well as an abbreviated form of the main title (running head) with no more than 40 characters (including blanks). The short title will be displayed on the top of each page of the final version.

The article title and subtitle should be in sentence case. Use lowercase letters after colon.

- Affiliations

For the corresponding author supply the following details: e-mail address, department, institution, street, city, postal code and country; for all other authors department, institution, city, postal code and country are mandatory. Please also provide all details concerning the current institutional affiliation in case you changed affiliation during the manuscript preparation and publication process.

Supplying an ORCID is highly recommended (for more information and registration, please visit the ORCID webpage: <https://info.orcid.org/benefits-for-researchers/>)

- Please also indicate the word count, number of tables and figures, and whether your manuscript contains supplementary material.

### Language

All manuscripts must be written in clear and concise English and/or Chinese. Please use British or American English consistently. De Gruyter does provide a *light* copyedit of manuscripts, but authors remain responsible for being their own copyeditors. If you have reasons to doubt your proficiency with respect to spelling, grammar, etc. (e.g., because English is not your native language), then you may wish to employ – at your expense – the services of a professional language editor.

For all articles in Chinese language please provide English translations of the article title, Keywords, Abstracts author names and affiliations.

For all articles in English language please provide Chinese translations of the article title, Keywords, Abstracts author names and affiliations.

### General format and manuscript elements

(to be considered no later than after acceptance with revision)

#### Manuscript formatting

Manuscripts must be typed double-spaced on one side of A4 or 8.5-inch paper with margins of at least 2.5 cm (or 1 inch) all round. The paper can be max. 9,500 words + references + appendix.

For bi- and multilingual examples, use italics for one language, CAPITALS and underlining for the others (in that order).



**Abstract**

Give a concise summary of your article in an abstract of approx. 250 words in a single paragraph. As abstracts are published separately by abstracting and indexing services, please spell out abbreviations at first use and do not include footnotes, tables, figures or equations. Avoid using references. If it is essential to use a reference in the abstract, please expand it as per journal reference style.

**Keywords**

Keywords are used by abstracting and indexing services as well as search engines to facilitate finding your paper. Together with the abstract of your paper, they are a key tool enabling readers to find your paper and for increasing citations.

Supply 3–6 specific keywords in alphabetical order and lower case, separated by semicolon.

These can be single words, but also short phrases representing the content. Make sure to select precise and concise keywords to your field or sub-field of research. Avoid abbreviations and the repetition of words already used in the article's title.

**Headings**

Your manuscript should be subdivided into sections (and, if necessary, subsections). These sections should be labeled with headings in a consistent format and with a clear hierarchy of section headings. Limit your subsections to a maximum of four levels. For subdivided sections ensure that they have at least two subheadings on one level. Headings do not have an end period.

Headings should be numbered and in sentence case. Use lowercase letters after colon.

**References**

Please adhere strictly to the reference style of *GLOCHI* as outlined in the [Mouton Journal Style Sheet](#). The style sheet provides examples for different types of citations in the text as well as for different bibliographic items in the reference list. Please note: All references mentioned in the reference list must be mentioned in the text, and vice versa.

**Figures and figure captions**

Graphs, line drawings, photographs, schemes, diagrams, etc. may be used to illustrate your findings. Publication of color figures is provided free of charge in both online and print editions. The publication quality always depends directly on the quality and size of the delivered data.

Please label the illustrations as “Figure”. Each figure should be uploaded separately as .jpg, .eps, .png or .tiff file. Images should have a minimum resolution of 300 dpi (color or black-white pixel graphics/half-tone images) in the intended size (600dpi combination of pixel graphic and line drawing, 1200dpi for line drawings). When drawing bar graphs, use patterning/color instead of grey scales (faint shading may be lost upon reproduction). Figures should not display any frames.

Figures should be numbered consecutively using Arabic numerals (from 1) throughout the text. If you include multi-part figures, please make sure to label all part figures by using lowercase letters in brackets. Please make sure that all figures are explicitly referred to in the text. Do not end the text immediately preceding the suggested positioning of a figure with a colon and avoid expressions such as “in Figure 1 below/above”, as the exact positioning of these elements cannot be determined until after the manuscript has been typeset. Note that figures will usually be placed on the top or the bottom of the page in the final layout.

Provide a concise and self-explanatory caption for each figure. In case of multi-part figures, please include a main caption as well as part figure captions.

The key to the symbols depicted in the figures should be included in the figure itself, where possible. Otherwise, include it in the caption. The caption itself should not be included in the figure.

Please make sure that letters, numbers, symbols, text, etc. included in the figure are clear, easy to read (not below 6pt, preferably in Arial or Helvetica) and uniform in style.

It is the authors' responsibility to use images that do not infringe on any copyrights, performing rights, trademark rights, personal rights or any other third-party rights or are otherwise unlawful. Copyright permissions can be obtained through the Copyright Clearance Center (<https://www.copyright.com/>).

**Tables and table captions**

Number tables consecutively using Arabic numerals. Tables should be provided in an editable source format (Word, LaTeX). Please avoid handing in tables as image or Excel files.



Provide a short descriptive title, column heads, and (if necessary) footnotes to make each table self-explanatory. In column heads, separate units with a comma and use parentheses or square brackets for additional measures (e.g., %, range, etc.). Use footnotes in alphabetical order (a, b, c, etc.) to give emphasis or further information. Expand abbreviations used in tables in footnotes.

In case bold type or italics are used to highlight information, please explain their meaning.

Avoid color, shading, vertical lines, and other cell borders. Note that most horizontal lines within the table body will be removed during the production process.

Indicate where to place the table approximately (e.g., [Place Table 1 near here]). Do not end the text immediately preceding the suggested positioning of a table with a colon and avoid expressions such as “in Table 1 below/above”, as the exact positioning of these elements cannot be determined until after the manuscript has been typeset. Note that tables will usually be placed on the top or the bottom of the page in the final layout.

### Abbreviations

The use of abbreviations and acronyms is permitted given that they are expanded in full when used the first time with the abbreviation in parentheses (applies to abstract and main text). Please use them consistently thereafter. Avoid using non-standard abbreviations unless they appear more than three times in the text. We recommend providing a list with an overview of all abbreviations.

### Equations and symbols

Equations should be well-aligned and not crowded. Use only Latin and Greek alphabets. Avoid complicated superscripts and subscripts by introducing new symbols. Avoid repetition of a complicated expression by representing it with a symbol. For MS Word submissions create equations using the Microsoft equation editor or a corresponding add-on. Do not submit math equations as images, but as editable text. Number displayed equations consecutively with Arabic numerals (if referred to in the text).

### Linguistic examples

Keep the use of italic and bold font type, underlining and background color in tables to a minimum and make only use of it when absolutely necessary to draw attention to a particular linguistic feature that cannot be highlighted otherwise.

Linguistic examples with interlinear glossing should follow the “Leipzig glossing rules” (<http://www.eva.mpg.de/lingua/resources/glossing-rules.php>). Align glosses using tables preferably or tabs. Do NOT use space bars. The example source should be listed on a new line left-aligned with the example text. Examples in English should be set in italics.

References to examples in the text should take the form “see (2a) and (2b)” with both number and letter in brackets.

Please see below for an example on how to format a linguistic example:

- (1) *qwél-em*                      *te*                      *Strang*                      *te*                      *sth'óqwi.*  
barbecue-INTR                      DET                      Strang                      DET                      fish  
'Strang barbecues the fish.'  
(Wiltschko 2006: 202)
- (2) a. *bawla*                      *lagahk*                      *loä.*  
I.saw                      SELF                      me  
'I saw myself.'  
(Gast and Siemund 2006: 355)
- b. *lagahk*                      *Juan*                      *kayuhn-ni*                      *rolihdz-ni.*  
SELF                      Juan                      Is.building-3SG                      house-3SG.POSS  
'Juan himself is building his house.'  
(Gast and Siemund 2006: 355)
- c. *Juan*                      *ensilaani*                      *kayuhn-ni*                      *rolihdz-ni.*  
Juan                      SELF.AO                      Is.building-3SG                      house-3SG.POSS  
'Juan is building his house himself.'  
(Gast and Siemund 2006: 355)
- (3) *I sent the artefacts to an anthropologist.*

**Units**

Use SI units. For more information, please visit <https://www.bipm.org/en/home>

**Audio and Video**

For all examples connected to an audio/video recording, supply audio/video clips. Deliver these clips as separate files and do not integrate them directly into the manuscript.

Name all your clips using the following convention:

e.g., audio-1-smith.MP3, video-1-smith.MP4,

[media]-[identifier]-[author-family-name].[extension]

Indicate the position in the article by placing a marker as follows:

[associated audio-1-smith.wav with example (1)]

Provide a short caption for each media file and number them consecutively. Any other media files can be included as part of the supplementary material.

File naming: audiosupplement-1-smith.MP3,

[media.supplement]-[identifier]-[author-family-name].[extension]

The following formats are preferred: audio files in MP3 (at least 16 bit) and video files in MP4 (at least a height of 480 pixels and a frame rate of 25). However, other common formats are also permitted.

**Appendices**

Use appendices for information that supports your findings but is not essential for the understanding of your paper (e.g., lengthy mathematical proofs, tables, graphics, etc.). Cite appendices within the main text. Tables and figures in the appendix should be numbered consecutively as follows: Figure A.1, Table A.1, Figure A.2, Table A.2, etc. The appendix is placed at the end of the main text before the reference list.

**Supplementary material**

Supplementary material which may offer further information on your work but does not belong to the core part of the article, will not be part of the typeset article PDF. The material will be made available as a separate download in the online version of the article. Supplementary material may contain questionnaires for discussed surveys, protocols, code samples, datasets, extensive tables, additional figures, multimedia files (audio, video, animations), etc. If the manuscript is accepted, supplementary material will be referenced in the print version, but will be published online only.

Please provide supplementary material data as separate file(s) of no more than 10 MB per file during submission.

Note that the material should be publication-ready (not in track-changes mode), as it will not be typeset, but published exactly as supplied. Within the text, the supplementary material must be cited consecutively and be referred to as supplementary material data (e.g., see Supplementary Material, Fig. 1, or Figure S1, Table S1, etc.).

**Author biography**

Provide a brief biography (max. 50–70 words) including, e.g., your qualifications, awards won, membership of professional societies, and highlighting your expertise/research interests related to the article's topic. Submit the biographies as a separate file.

**Please contact the journal coordinator for any further questions:**

Name: Sabine v.Wittke-Holweg

Email: [sabine.von.wittke@degruyter.com](mailto:sabine.von.wittke@degruyter.com)
